# Supplementary material for: Single-Cell Analysis of the Multicellular Ecosystem in Viral Carcinogenesis by HTLV-1
Source: Oxford University Press journal article supplement (doi:10.1158/2643-3230.bcd-21-0044), 2021-07-13
Supplement: 26433230bcd210044-sup-261892_2_supp_7232328_qvryb0.xlsx [file 26433230bcd210044-sup-261892_2_supp_7232328_qvryb0.xlsx]

## Sheet: Sheet1
Patient ID	Sample ID	Number of uninfected CD4+ T cells expressing productive TCR α and/or β transcripts								Number of malignant clonal cells expressing productive TCR α and/or β transcripts*								STARTRAC-expa index†
		αβ	αα	ββ	ααβ	αββ	ααββ	α	β	αβ	αα	ββ	ααβ	αββ	ααββ	α	β	Naive	EM	Infected/Treg	Malignant	CD8+ T	FOXP3-	FOXP3+
HD01	HD01	521	4	9	22	19	4	10	240	N/A	N/A	N/A	N/A	N/A	N/A	N/A	N/A	0	0.00221653	0.0125	N/A	0.205446	N/A	N/A
HD02	HD02	317	0	4	31	11	4	12	126	N/A	N/A	N/A	N/A	N/A	N/A	N/A	N/A	0.00127781	0.000806998	0	N/A	0.0571765	N/A	N/A
HD03	HD03	360	2	6	51	19	9	22	81	N/A	N/A	N/A	N/A	N/A	N/A	N/A	N/A	0.00343083	0.00440903	0	N/A	0.127803	N/A	N/A
HD04	HD04	512	2	11	25	17	3	31	488	N/A	N/A	N/A	N/A	N/A	N/A	N/A	N/A	0	0.0014588	0	N/A	0.0468733	N/A	N/A
AC01	AC01	549	0	4	44	22	14	32	257	N/A	N/A	N/A	N/A	N/A	N/A	N/A	N/A	0	0.00195623	0.0298184	N/A	0.374663	0.0299069	0.0183554
AC02	AC02	965	4	9	76	22	7	43	318	N/A	N/A	N/A	N/A	N/A	N/A	N/A	N/A	0	0.0516295	0.067167	N/A	0.213628	0.0746211	0.0321208
AC03	AC03	1069	10	5	99	32	12	40	251	N/A	N/A	N/A	N/A	N/A	N/A	N/A	N/A	0	0.00788986	0.299246	N/A	0.198626	0.0529712	0.400142
AC04	AC04	332	0	0	33	2	3	11	76	N/A	N/A	N/A	N/A	N/A	N/A	N/A	N/A	0	0.00770268	0.251089	N/A	0.111713	N/A	0.297258
AC05	AC05	1557	7	14	131	68	36	65	343	N/A	N/A	N/A	N/A	N/A	N/A	N/A	N/A	0	0.0113795	0.0558659	N/A	0.106096	0.0411455	0.0518906
AC06	AC06	339	1	8	9	6	0	18	345	N/A	N/A	N/A	N/A	N/A	N/A	N/A	N/A	1.11022e-16	0.0054021	0.130227	N/A	0.126864	0.0307492	0.16387
AC07	AC07	823	0	21	40	37	9	33	475	N/A	N/A	N/A	N/A	N/A	N/A	N/A	N/A	0	0.00309215	0.00501341	N/A	0.0537931	0	2.22045e-16
AC08	AC08	533	2	7	24	9	5	28	403	N/A	N/A	N/A	N/A	N/A	N/A	N/A	N/A	0	0.0021441	0.0214918	N/A	0.22378	N/A	N/A
AC09	AC09	415	4	21	11	22	5	14	431	N/A	N/A	N/A	N/A	N/A	N/A	N/A	N/A	0	0.0113757	0.240427	N/A	0.219118	0.133495	0.271448
AC10	AC10	792	3	9	85	53	48	32	238	N/A	N/A	N/A	N/A	N/A	N/A	N/A	N/A	2.22045e-16	0.00205786	N/A	N/A	0.251085	N/A	N/A
AC11	AC11	891	0	7	61	17	6	38	282	N/A	N/A	N/A	N/A	N/A	N/A	N/A	N/A	0.000707194	0.00263691	0.0498958	N/A	0.176786	0.0521542	0.0158024
ATL01	ATL01	341	1	2	31	17	5	12	98	471	0	0	0	6	0	0	172	0.00118101	0.00677233	0.0828866	0.702148	0.261351	0.0274891	0.100923
ATL01	ATL01-2	392	2	2	45	9	7	7	88	1803	0	56	40	874	0	19	367	0	0.00092114	0.0519626	0.770521	0.122443	N/A	0.0676462
ATL02	ATL02	27	0	0	4	1	0	1	8	5	0	0	0	0	0	0	3551	N/A	N/A	0.0216466	0.980262	0.204572	N/A	0
ATL02	ATL02-2	1	0	1	0	0	0	0	3	348	0	29	0	35	0	0	2322	N/A	N/A	N/A	0.879903	N/A	N/A	N/A
ATL03	ATL03	85	0	0	7	0	0	4	16	3227	0	0	0	57	0	63	382	0.0130225	0.00778926	0.51926	0.907365	0.48912	N/A	0.785526
ATL04	ATL04	297	2	1	16	6	1	13	102	42	0	0	265	0	0	5	6	0	0.00188883	0.200267	0.567823	0.0825998	N/A	0.202623
ATL05	ATL05	27	2	0	1	0	0	2	10	1577	0	0	0	0	0	26	229	2.22045e-16	N/A	N/A	0.937294	0.149575	N/A	N/A
ATL06	ATL06	202	0	0	15	8	1	7	57	1888	0	0	0	16	0	12	199	0	0.0084831	0.186217	0.904225	0.506386	0	0.255863
ATL06	ATL06-2	7	0	0	0	2	0	3	3	3450	0	0	0	0	0	24	51	N/A	N/A	N/A	0.98376	N/A	N/A	N/A
ATL07	ATL07	71	0	1	1	1	0	3	52	1154	13	0	1414	0	0	31	88	1.11022e-16	0	0.0501827	0.868917	0.0872027	N/A	0.0649247
ATL08	ATL08	4	0	1	3	0	0	0	6	5507	0	0	0	0	0	13	143	N/A	N/A	N/A	0.982392	N/A	N/A	N/A
ATL09	ATL09	2	0	0	0	0	0	0	0	5606	0	0	0	0	0	129	553	N/A	N/A	N/A	0.953917	N/A	N/A	N/A
ATL10	ATL10	3	0	0	0	0	0	0	1	0	0	0	0	0	0	0	2768	N/A	N/A	N/A	0.996818	N/A	N/A	N/A
ATL11	ATL11	112	1	1	9	1	0	9	49	2496	0	0	0	0	0	133	340	1.11022e-16	2.22045e-16	N/A	0.930499	0.115571	N/A	N/A
ATL12	ATL12	0	0	0	0	0	0	0	0	1198	0	0	0	0	0	0	695	N/A	N/A	N/A	0.911085	N/A	N/A	N/A
ATL13	ATL13	37	0	0	2	0	0	3	7	2186	0	0	0	0	0	27	27	0	N/A	0.911277	0.979234	0.0650486	N/A	0.911277
ATL14	ATL14	45	0	0	2	0	0	2	11	3833	0	0	0	0	0	173	500	N/A	0.0187139	0.107596	0.932619	0.213227	N/A	0.032658
ATL15	ATL15	26	0	0	1	1	0	0	9	1695	0	0	0	5	0	348	115	N/A	N/A	0.0353245	0.898255	0.475321	N/A	N/A
ATL16	ATL16	114	0	0	8	3	0	1	32	390	0	0	0	0	0	0	229	0	0.00576243	0.287324	0.86917	0.276263	N/A	0.392782
ATL17	ATL17	181	3	1	14	5	1	9	68	630	0	0	0	0	0	0	888	0	0	0.493601	0.900858	0.271273	N/A	0.521428
ATL18	ATL18	172	0	0	9	3	0	9	44	330	0	0	0	0	0	3146	58	0	0	0.105592	0.943222	0.203257	N/A	0.109721
ATL19	ATL19	22	0	0	5	0	1	2	4	5	0	0	0	0	5	2146	0	N/A	N/A	N/A	0.98556	0.44187	N/A	N/A
ATL20	ATL20	3	0	0	1	1	0	0	2	2551	0	0	0	0	0	23	449	N/A	N/A	N/A	0.941449	N/A	N/A	N/A
ATL21	ATL21	22	0	0	2	1	0	0	9	282	0	0	0	0	0	0	241	0	N/A	N/A	0.877553	N/A	N/A	N/A
ATL22	ATL22	867	2	10	49	23	6	46	457	196	0	0	0	0	0	154	14	0	0	0.0212522	0.775845	0.0970403	0.0207523	0
ATL22	ATL22-2	82	0	0	11	2	0	4	22	3602	0	0	0	0	0	571	35	0	0	N/A	0.937095	0.0889369	N/A	N/A
ATL23	ATL23	29	0	2	1	10	1	0	14	0	0	4605	0	21	0	0	340	0	N/A	0.380823	0.958548	0.253063	N/A	0.46596
ATL24	ATL24	1085	10	8	96	49	25	72	287	1812	0	0	5	0	0	7	433	0	0.00614422	0.099519	0.862916	0.305577	0.0314406	0.109869
ATL25	ATL25	82	0	1	7	3	1	2	14	4226	0	0	0	0	6	51	111	0	1.11022e-16	0.124638	0.965727	0.370409	N/A	0.155672
ATL26	ATL26	30	0	0	2	0	0	2	10	655	0	0	0	0	0	62	104	N/A	2.22045e-16	N/A	0.898778	N/A	N/A	N/A
ATL27	ATL27	209	1	2	15	0	0	8	60	1301	0	0	0	0	0	7	156	1.11022e-16	0.0327202	0.117155	0.942017	0.0119191	N/A	N/A
ATL28	ATL28	105	2	0	5	1	0	7	24	3612	0	0	0	0	0	107	1047	0	0	N/A	0.922297	0.204332	N/A	N/A
ATL29	ATL29	7	1	0	0	0	0	0	5	2595	0	0	0	0	0	6	982	N/A	N/A	0.815766	0.926505	0	N/A	0.815766
ATL30	ATL30	108	0	0	9	1	0	5	32	2719	0	0	0	0	13	41	219	0.00576243	0.0278565	0.466244	0.89907	0.357378	N/A	0.520577
* If five or more malignant cells (from ATL samples) had the identical complementarity-determining region 3 amino acid sequences, they were defined as malignant clonal cells.
† STARTRAC-expa index was calculated in malignant cluster (of ATL samples), CD8+ T cell cluster and CD4+ T cell subclusters with >=30 cells for each sample.
N/A, not available.

## Sheet: Sheet2
Sample ID	CDR3 amino acid sequences	Most expanded clone	Identical clones with the most expanded clone	Clones with additional substitutions/indels	Independent clone	Cell number							CDR3 Amino acid sequences				First TRA (TRA1)			First TRB (TRB1)			Second TRA (TRA2)			Second TRB (TRB2)			MIXCR validation using bulk DNA-seq					MIXCR validation using bulk RNA-seq
						Naive CD4+ T cells	Effector CD4+ T cells	Infected/Treg CD4+ T cells	Cytotoxic CD4+ T cells	Malignant cells	CD8+ T cells	Total	First TRA (TRA1)	Second TRA (TRA2)	First TRB (TRB1)	Second TRB (TRB2)	V gene	J gene	C gene	V gene	J gene	C gene	V gene	J gene	C gene	V gene	J gene	C gene	Type of DNA-seq	TRA1 detected	TRA2 detected	TRB1 detected	TRB2 detected	Bulk RNA-seq	TRA1 detected	TRA2 detected	TRB1 detected	TRB2 detected
ATL01	TRA:CAGEGGSGNTGKLIF;TRB:CASSLGETQYF	YES	NO	NO	NO	0	0	0	0	410	0	410	CAGEGGSGNTGKLIF	NA	CASSLGETQYF	NA	TRAV25	TRAJ37	TRAC	TRBV3-1	TRBJ2-5	TRBC2	NA	NA	NA	NA	NA	NA	WES	YES	NA	YES	NA	NA	NA	NA	NA	NA
ATL01	TRB:CASSLGETQYF	NO	YES	NO	NO	0	0	1	0	172	0	173	NA	NA	CASSLGETQYF	NA	NA	NA	NA	TRBV3-1	TRBJ2-5	TRBC2	NA	NA	NA	NA	NA	NA	WES	NA	NA	YES	NA	NA	NA	NA	NA	NA
ATL01	TRA:CGSGNTGKLIF;TRB:CASSLGETQYF	NO	NO	YES	NO	0	0	0	0	50	0	50	CGSGNTGKLIF	NA	CASSLGETQYF	NA	TRAV25	TRAJ37	TRAC	TRBV3-1	TRBJ2-5	TRBC2	NA	NA	NA	NA	NA	NA	WES	NO	NA	YES	NA	NA	NA	NA	NA	NA
ATL01	TRA:CAGEGGSGNTGKLIF;TRB:CASSLGDTQYF	NO	NO	YES	NO	0	0	0	0	11	0	11	CAGEGGSGNTGKLIF	NA	CASSLGDTQYF	NA	TRAV25	TRAJ37	TRAC	TRBV3-1	TRBJ2-5	TRBC2	NA	NA	NA	NA	NA	NA	WES	YES	NA	NO	NA	NA	NA	NA	NA	NA
ATL01	TRA:CAGEGGSGNTGKLIF;TRB:CASSLGDTQYF;TRB:CASSLGETQYF	NO	NO	YES	NO	0	0	0	0	6	0	6	CAGEGGSGNTGKLIF	NA	CASSLGDTQYF	CASSLGETQYF	TRAV25	TRAJ37	TRAC	TRBV3-1	TRBJ2-5	TRBC2	NA	NA	NA	TRBV3-1	TRBJ2-5	TRBC2	WES	YES	NA	NO	YES	NA	NA	NA	NA	NA
ATL01-2	TRA:CAGEGGSGNTGKLIF;TRB:CASSLGDTQYF;TRB:CASSLGETQYF	YES	NO	YES	NO	0	0	0	0	861	0	861	CAGEGGSGNTGKLIF	NA	CASSLGDTQYF	CASSLGETQYF	TRAV25	TRAJ37	TRAC	TRBV3-1	TRBJ2-5	TRBC2	NA	NA	NA	TRBV3-1	TRBJ2-5	TRBC2	WES	YES	NA	YES	YES	Bulk RNA-seq	YES	NA	YES	YES
ATL01-2	TRA:CAGEGGSGNTGKLIF;TRB:CASSLGDTQYF	NO	NO	YES	NO	0	0	0	0	782	0	782	CAGEGGSGNTGKLIF	NA	CASSLGDTQYF	NA	TRAV25	TRAJ37	TRAC	TRBV3-1	TRBJ2-5	TRBC2	NA	NA	NA	NA	NA	NA	WES	YES	NA	YES	NA	Bulk RNA-seq	YES	NA	YES	NA
ATL01-2	TRA:CGSGNTGKLIF;TRB:CASSLGETQYF	NO	NO	YES	NO	0	0	2	0	757	0	759	CGSGNTGKLIF	NA	CASSLGETQYF	NA	TRAV25	TRAJ37	TRAC	TRBV3-1	TRBJ2-5	TRBC2	NA	NA	NA	NA	NA	NA	WES	YES	NA	YES	NA	Bulk RNA-seq	YES	NA	YES	NA
ATL01-2	TRA:CAGEGGSGNTGKLIF;TRB:CASSLGETQYF	NO	YES	NO	NO	0	0	0	0	264	0	264	CAGEGGSGNTGKLIF	NA	CASSLGETQYF	NA	TRAV25	TRAJ37	TRAC	TRBV3-1	TRBJ2-5	TRBC2	NA	NA	NA	NA	NA	NA	WES	YES	NA	YES	NA	Bulk RNA-seq	YES	NA	YES	NA
ATL01-2	TRB:CASSLGETQYF	NO	YES	NO	NO	0	0	0	0	216	0	216	NA	NA	CASSLGETQYF	NA	NA	NA	NA	TRBV3-1	TRBJ2-5	TRBC2	NA	NA	NA	NA	NA	NA	WES	NA	NA	YES	NA	Bulk RNA-seq	NA	NA	YES	NA
ATL01-2	TRB:CASSLGDTQYF	NO	NO	YES	NO	0	0	0	0	151	0	151	NA	NA	CASSLGDTQYF	NA	NA	NA	NA	TRBV3-1	TRBJ2-5	TRBC2	NA	NA	NA	NA	NA	NA	WES	NA	NA	YES	NA	Bulk RNA-seq	NA	NA	YES	NA
ATL01-2	TRB:CASSLGDTQYF;TRB:CASSLGETQYF	NO	NO	YES	NO	0	0	0	0	56	0	56	NA	NA	CASSLGDTQYF	CASSLGETQYF	NA	NA	NA	TRBV3-1	TRBJ2-5	TRBC2	NA	NA	NA	TRBV3-1	TRBJ2-5	TRBC2	WES	NA	NA	YES	YES	Bulk RNA-seq	NA	NA	YES	YES
ATL01-2	TRA:CAGEGGSGNTGKLIF;TRA:CGSGNTGKLIF;TRB:CASSLGETQYF	NO	NO	YES	NO	0	0	0	0	40	0	40	CAGEGGSGNTGKLIF	CGSGNTGKLIF	CASSLGETQYF	NA	TRAV25	TRAJ37	TRAC	TRBV3-1	TRBJ2-5	TRBC2	TRAV25	TRAJ37	TRAC	NA	NA	NA	WES	YES	YES	YES	NA	Bulk RNA-seq	YES	YES	YES	NA
ATL01-2	TRA:CAGEGGSGNTGKLIF	NO	YES	NO	NO	0	0	0	0	19	0	19	CAGEGGSGNTGKLIF	NA	NA	NA	TRAV25	TRAJ37	TRAC	NA	NA	NA	NA	NA	NA	NA	NA	NA	WES	YES	NA	NA	NA	Bulk RNA-seq	YES	NA	NA	NA
ATL01-2	TRA:CGSGNTGKLIF;TRB:CASSLGDTQYF;TRB:CASSLGETQYF	NO	NO	YES	NO	0	0	0	0	13	0	13	CGSGNTGKLIF	NA	CASSLGDTQYF	CASSLGETQYF	TRAV25	TRAJ37	TRAC	TRBV3-1	TRBJ2-5	TRBC2	NA	NA	NA	TRBV3-1	TRBJ2-5	TRBC2	WES	YES	NA	YES	YES	Bulk RNA-seq	YES	NA	YES	YES
ATL02	TRB:CASSEGGYGYTF	YES	NO	NO	NO	0	0	0	0	3551	0	3551	NA	NA	CASSEGGYGYTF	NA	NA	NA	NA	TRBV6-1	TRBJ1-2	TRBC1	NA	NA	NA	NA	NA	NA	WES	NA	NA	YES	NA	Bulk RNA-seq	NA	NA	YES	NA
ATL02	TRA:CALTRAGGGNKLTF;TRB:CASSEGGYGYTF	NO	YES	NO	NO	0	0	0	0	5	0	5	CALTRAGGGNKLTF	NA	CASSEGGYGYTF	NA	TRAV16	TRAJ10	None	TRBV6-1	TRBJ1-2	TRBC1	NA	NA	NA	NA	NA	NA	WES	YES	NA	YES	NA	Bulk RNA-seq	YES	NA	YES	NA
ATL02-2	TRB:CASSEGGYGYTF	YES	NO	NO	NO	0	0	0	0	2247	0	2247	NA	NA	CASSEGGYGYTF	NA	NA	NA	NA	TRBV6-1	TRBJ1-2	TRBC1	NA	NA	NA	NA	NA	NA	NA	NA	NA	NA	NA	Bulk RNA-seq	NA	NA	YES	NA
ATL02-2	TRA:CIAQTGTASKLTF;TRB:CASSVGVQETQYF	NO	NO	NO	YES	0	0	1	0	262	1	264	CIAQTGTASKLTF	NA	CASSVGVQETQYF	NA	TRAV26-1	TRAJ44	TRAC	TRBV2	TRBJ2-5	TRBC2	NA	NA	NA	NA	NA	NA	NA	NA	NA	NA	NA	Bulk RNA-seq	YES	NA	YES	NA
ATL02-2	TRB:CASSVGVQETQYF	NO	NO	NO	YES	0	0	2	0	75	0	77	NA	NA	CASSVGVQETQYF	NA	NA	NA	NA	TRBV2	TRBJ2-5	TRBC2	NA	NA	NA	NA	NA	NA	NA	NA	NA	NA	NA	Bulk RNA-seq	NA	NA	YES	NA
ATL02-2	TRA:CIAQTGTASKLTF;TRB:CASSEGGYGYTF	NO	YES	NO	NO	0	0	0	0	45	0	45	CIAQTGTASKLTF	NA	CASSEGGYGYTF	NA	TRAV26-1	TRAJ44	TRAC	TRBV6-1	TRBJ1-2	TRBC1	NA	NA	NA	NA	NA	NA	NA	NA	NA	NA	NA	Bulk RNA-seq	YES	NA	YES	NA
ATL02-2	TRA:CIAQTGTASKLTF;TRB:CASSEGGYGYTF;TRB:CASSVGVQETQYF	NO	YES	NO	NO	0	0	0	0	30	0	30	CIAQTGTASKLTF	NA	CASSEGGYGYTF	CASSVGVQETQYF	TRAV26-1	TRAJ44	TRAC	TRBV6-1	TRBJ1-2	TRBC1	NA	NA	NA	TRBV2	TRBJ2-5	TRBC2	NA	NA	NA	NA	NA	Bulk RNA-seq	YES	NA	YES	YES
ATL02-2	TRB:CASSEGGYGYTF;TRB:CASSVGVQETQYF	NO	YES	NO	NO	0	0	0	0	29	0	29	NA	NA	CASSEGGYGYTF	CASSVGVQETQYF	NA	NA	NA	TRBV6-1	TRBJ1-2	TRBC1	NA	NA	NA	TRBV2	TRBJ2-5	TRBC2	NA	NA	NA	NA	NA	Bulk RNA-seq	NA	NA	YES	YES
ATL02-2	TRA:CAVATYGNNRLAF;TRB:CASRFEPGWYEQYF	NO	NO	NO	YES	0	0	0	0	11	0	11	CAVATYGNNRLAF	NA	CASRFEPGWYEQYF	NA	TRAV8-3	TRAJ7	TRAC	TRBV5-1	TRBJ2-7	TRBC2	NA	NA	NA	NA	NA	NA	NA	NA	NA	NA	NA	Bulk RNA-seq	YES	NA	YES	NA
ATL02-2	TRA:CAVCNAGNMLTF;TRB:CASRLAGAYNEQFF	NO	NO	NO	YES	0	0	0	0	11	0	11	CAVCNAGNMLTF	NA	CASRLAGAYNEQFF	NA	TRAV21	TRAJ39	TRAC	TRBV19	TRBJ2-1	TRBC2	NA	NA	NA	NA	NA	NA	NA	NA	NA	NA	NA	Bulk RNA-seq	YES	NA	YES	NA
ATL02-2	TRA:CIAQTGTANKVTF;TRB:CASSIGVQETQYF	NO	NO	NO	YES	0	0	0	0	11	0	11	CIAQTGTANKVTF	NA	CASSIGVQETQYF	NA	TRAV26-1	TRAJ44	TRAC	TRBV2	TRBJ2-5	TRBC2	NA	NA	NA	NA	NA	NA	NA	NA	NA	NA	NA	Bulk RNA-seq	YES	NA	YES	NA
ATL02-2	TRA:CAVGAPRIKAAGNKLTF;TRB:CASTLGGLQPQHF	NO	NO	NO	YES	0	0	0	0	8	0	8	CAVGAPRIKAAGNKLTF	NA	CASTLGGLQPQHF	NA	TRAV12-2	TRAJ17	TRAC	TRBV19	TRBJ1-5	TRBC1	NA	NA	NA	NA	NA	NA	NA	NA	NA	NA	NA	Bulk RNA-seq	YES	NA	NO	NA
ATL02-2	TRA:CIAQTGTANKVTF;TRB:CASSIGVQETQYF;TRB:CASSVGVQETQYF	NO	NO	NO	YES	0	0	0	0	5	0	5	CIAQTGTANKVTF	NA	CASSIGVQETQYF	CASSVGVQETQYF	TRAV26-1	TRAJ44	TRAC	TRBV2	TRBJ2-5	TRBC2	NA	NA	NA	TRBV2	TRBJ2-5	TRBC2	NA	NA	NA	NA	NA	Bulk RNA-seq	YES	NA	YES	YES
ATL03	TRA:CAANQGGKLIF;TRB:CASSPTGGYGYTF	YES	NO	NO	NO	0	0	20	0	3034	1	3055	CAANQGGKLIF	NA	CASSPTGGYGYTF	NA	TRAV13-1	TRAJ23	TRAC	TRBV3-1	TRBJ1-2	TRBC1	NA	NA	NA	NA	NA	NA	WES	YES	NA	YES	NA	Bulk RNA-seq	YES	NA	YES	NA
ATL03	TRB:CASSPTGGYGYTF	NO	YES	NO	NO	0	0	1	0	376	1	378	NA	NA	CASSPTGGYGYTF	NA	NA	NA	NA	TRBV3-1	TRBJ1-2	TRBC1	NA	NA	NA	NA	NA	NA	WES	NA	NA	YES	NA	Bulk RNA-seq	NA	NA	YES	NA
ATL03	TRA:CAANQGGKLIF;TRB:CASSPTGGYGYIF	NO	NO	YES	NO	0	0	0	0	185	3	188	CAANQGGKLIF	NA	CASSPTGGYGYIF	NA	TRAV13-1	TRAJ23	TRAC	TRBV3-1	TRBJ1-2	TRBC1	NA	NA	NA	NA	NA	NA	WES	YES	NA	YES	NA	Bulk RNA-seq	YES	NA	YES	NA
ATL03	TRA:CAANQGGKLIF	NO	YES	NO	NO	0	0	1	0	63	0	64	CAANQGGKLIF	NA	NA	NA	TRAV13-1	TRAJ23	TRAC	NA	NA	NA	NA	NA	NA	NA	NA	NA	WES	YES	NA	NA	NA	Bulk RNA-seq	YES	NA	NA	NA
ATL03	TRA:CAANQGGKLIF;TRB:CASSPTGGYGYTF;TRB:CASSPTGGYGYIF	NO	NO	YES	NO	0	0	0	0	45	0	45	CAANQGGKLIF	NA	CASSPTGGYGYTF	CASSPTGGYGYIF	TRAV13-1	TRAJ23	TRAC	TRBV3-1	TRBJ1-2	TRBC1	NA	NA	NA	TRBV3-1	TRBJ1-2	TRBC1	WES	YES	NA	YES	YES	Bulk RNA-seq	YES	NA	YES	YES
ATL03	TRA:CAANQGGKLIF;TRB:CASSPTGGYGYTF;TRB:CVSSPTGGYGYTF	NO	NO	YES	NO	0	0	0	0	12	0	12	CAANQGGKLIF	NA	CASSPTGGYGYTF	CVSSPTGGYGYTF	TRAV13-1	TRAJ23	TRAC	TRBV3-1	TRBJ1-2	TRBC1	NA	NA	NA	TRBV3-1	TRBJ1-2	TRBC1	WES	YES	NA	YES	NO	Bulk RNA-seq	YES	NA	YES	YES
ATL03	TRA:CAANQGGKLIF;TRB:CVSSPTGGYGYTF	NO	NO	YES	NO	0	0	0	0	8	0	8	CAANQGGKLIF	NA	CVSSPTGGYGYTF	NA	TRAV13-1	TRAJ23	TRAC	TRBV3-1	TRBJ1-2	TRBC1	NA	NA	NA	NA	NA	NA	WES	YES	NA	NO	NA	Bulk RNA-seq	YES	NA	YES	NA
ATL03	TRB:CASSPTGGYGYIF	NO	NO	YES	NO	0	0	0	0	6	0	6	NA	NA	CASSPTGGYGYIF	NA	NA	NA	NA	TRBV3-1	TRBJ1-2	TRBC1	NA	NA	NA	NA	NA	NA	WES	NA	NA	YES	NA	Bulk RNA-seq	NA	NA	YES	NA
ATL04	TRA:CAVRPLRRSQGNLIF;TRA:CALMKRGTNDMRF;TRB:CASSLDGSYEQYF	YES	NO	NO	NO	0	0	0	0	193	0	193	CAVRPLRRSQGNLIF	CALMKRGTNDMRF	CASSLDGSYEQYF	NA	TRAV41	TRAJ42	TRAC	TRBV11-3	TRBJ2-7	TRBC2	TRAV38-1	TRAJ43	TRAC	NA	NA	NA	WES	YES	YES	YES	NA	Bulk RNA-seq	YES	YES	YES	NA
ATL04	TRA:CARDSGGSNYKLTF;TRB:CASSRGPGNYNEQFF	NO	NO	NO	YES	0	2	60	0	16	0	78	CARDSGGSNYKLTF	NA	CASSRGPGNYNEQFF	NA	TRAV25	TRAJ53	TRAC	TRBV6-4	TRBJ2-1	TRBC2	NA	NA	NA	NA	NA	NA	WES	NO	NA	NO	NA	Bulk RNA-seq	YES	NA	YES	NA
ATL04	TRA:CAVRPLRRSQGNLIF;TRA:CAFMKRGTNDMRF;TRB:CASSLDGSYEQYF	NO	NO	YES	NO	0	0	0	0	72	0	72	CAVRPLRRSQGNLIF	CAFMKRGTNDMRF	CASSLDGSYEQYF	NA	TRAV41	TRAJ42	TRAC	TRBV11-3	TRBJ2-7	TRBC2	TRAV38-1	TRAJ43	TRAC	NA	NA	NA	WES	YES	YES	YES	NA	Bulk RNA-seq	YES	YES	YES	NA
ATL04	TRA:CALMKRGTNDMRF;TRB:CASSLDGSYEQYF	NO	YES	NO	NO	0	0	0	0	12	0	12	CALMKRGTNDMRF	NA	CASSLDGSYEQYF	NA	TRAV38-1	TRAJ43	TRAC	TRBV11-3	TRBJ2-7	TRBC2	NA	NA	NA	NA	NA	NA	WES	YES	NA	YES	NA	Bulk RNA-seq	YES	NA	YES	NA
ATL04	TRA:CAFMKRGTNDMRF;TRB:CASSLDGSYEQYF	NO	NO	YES	NO	0	0	0	0	9	0	9	CAFMKRGTNDMRF	NA	CASSLDGSYEQYF	NA	TRAV38-1	TRAJ43	TRAC	TRBV11-3	TRBJ2-7	TRBC2	NA	NA	NA	NA	NA	NA	WES	YES	NA	YES	NA	Bulk RNA-seq	YES	NA	YES	NA
ATL04	TRB:CASSLDGSYEQYF	NO	YES	NO	NO	0	0	0	0	6	0	6	NA	NA	CASSLDGSYEQYF	NA	NA	NA	NA	TRBV11-3	TRBJ2-7	TRBC2	NA	NA	NA	NA	NA	NA	WES	NA	NA	YES	NA	Bulk RNA-seq	NA	NA	YES	NA
ATL04	TRA:CAFMKRGTNDMRF	NO	NO	YES	NO	0	0	0	0	5	0	5	CAFMKRGTNDMRF	NA	NA	NA	TRAV38-1	TRAJ43	TRAC	NA	NA	NA	NA	NA	NA	NA	NA	NA	WES	YES	NA	NA	NA	Bulk RNA-seq	YES	NA	NA	NA
ATL04	TRA:CAVRPLRRSQGNLIF;TRB:CASSLDGSYEQYF	NO	YES	NO	NO	0	0	0	0	5	0	5	CAVRPLRRSQGNLIF	NA	CASSLDGSYEQYF	NA	TRAV41	TRAJ42	TRAC	TRBV11-3	TRBJ2-7	TRBC2	NA	NA	NA	NA	NA	NA	WES	YES	NA	YES	NA	Bulk RNA-seq	YES	NA	YES	NA
ATL05	TRA:CAASIKAAGNKLTF;TRB:CSVEGQGVSGANVLTF	YES	NO	NO	NO	0	0	6	0	1577	0	1583	CAASIKAAGNKLTF	NA	CSVEGQGVSGANVLTF	NA	TRAV13-1	TRAJ17	TRAC	TRBV29-1	TRBJ2-6	TRBC2	NA	NA	NA	NA	NA	NA	WES	YES	NA	YES	NA	Bulk RNA-seq	YES	NA	YES	NA
ATL05	TRB:CSVEGQGVSGANVLTF	NO	YES	NO	NO	0	0	0	0	229	0	229	NA	NA	CSVEGQGVSGANVLTF	NA	NA	NA	NA	TRBV29-1	TRBJ2-6	TRBC2	NA	NA	NA	NA	NA	NA	WES	NA	NA	YES	NA	Bulk RNA-seq	NA	NA	YES	NA
ATL05	TRA:CAASIKAAGNKLTF	NO	YES	NO	NO	0	0	0	0	26	0	26	CAASIKAAGNKLTF	NA	NA	NA	TRAV13-1	TRAJ17	TRAC	NA	NA	NA	NA	NA	NA	NA	NA	NA	WES	YES	NA	NA	NA	Bulk RNA-seq	YES	NA	NA	NA
ATL06	TRA:CAASSASKIIF;TRB:CASSTGGSNQPQHF	YES	NO	NO	NO	0	3	36	0	1867	4	1910	CAASSASKIIF	NA	CASSTGGSNQPQHF	NA	TRAV13-1	TRAJ3	TRAC	TRBV19	TRBJ1-5	TRBC1	NA	NA	NA	NA	NA	NA	NA	NA	NA	NA	NA	Bulk RNA-seq	YES	NA	YES	NA
ATL06	TRB:CASSTGGSNQPQHF	NO	YES	NO	NO	0	1	7	0	199	7	214	NA	NA	CASSTGGSNQPQHF	NA	NA	NA	NA	TRBV19	TRBJ1-5	TRBC1	NA	NA	NA	NA	NA	NA	NA	NA	NA	NA	NA	Bulk RNA-seq	NA	NA	YES	NA
ATL06	TRA:CAASSASKIIF;TRB:CASSQDNSYAYYEQYF;TRB:CASSTGGSNQPQHF	NO	YES	NO	NO	0	0	0	0	16	2	18	CAASSASKIIF	NA	CASSQDNSYAYYEQYF	CASSTGGSNQPQHF	TRAV13-1	TRAJ3	TRAC	TRBV4-1	TRBJ2-7	TRBC2	NA	NA	NA	TRBV19	TRBJ1-5	TRBC1	NA	NA	NA	NA	NA	Bulk RNA-seq	YES	NA	YES	YES
ATL06	TRA:CAAPRGARLMF;TRB:CASSEEAGGTTNEKLFF	NO	NO	NO	YES	0	0	0	0	16	0	16	CAAPRGARLMF	NA	CASSEEAGGTTNEKLFF	NA	TRAV5	TRAJ31	TRAC	TRBV2	TRBJ1-4	TRBC1	NA	NA	NA	NA	NA	NA	NA	NA	NA	NA	NA	Bulk RNA-seq	YES	NA	YES	NA
ATL06	TRA:CAASSASKIIF	NO	YES	NO	NO	0	1	0	0	12	1	14	CAASSASKIIF	NA	NA	NA	TRAV13-1	TRAJ3	TRAC	NA	NA	NA	NA	NA	NA	NA	NA	NA	NA	NA	NA	NA	NA	Bulk RNA-seq	YES	NA	NA	NA
ATL06	TRA:CIFSNTDKLIF;TRB:CSARTEAGQSDMSTDTQYF	NO	NO	NO	YES	0	1	0	0	5	0	6	CIFSNTDKLIF	NA	CSARTEAGQSDMSTDTQYF	NA	TRAV26-1	TRAJ34	TRAC	TRBV20-1	TRBJ2-3	TRBC2	NA	NA	NA	NA	NA	NA	NA	NA	NA	NA	NA	Bulk RNA-seq	NO	NA	NO	NA
ATL06-2	TRA:CAASSASKIIF;TRB:CASSTGGSNQPQHF	YES	NO	NO	NO	0	0	3	0	3450	0	3453	CAASSASKIIF	NA	CASSTGGSNQPQHF	NA	TRAV13-1	TRAJ3	TRAC	TRBV19	TRBJ1-5	TRBC1	NA	NA	NA	NA	NA	NA	NA	NA	NA	NA	NA	Bulk RNA-seq	YES	NA	YES	NA
ATL06-2	TRB:CASSTGGSNQPQHF	NO	YES	NO	NO	1	0	1	0	51	0	53	NA	NA	CASSTGGSNQPQHF	NA	NA	NA	NA	TRBV19	TRBJ1-5	TRBC1	NA	NA	NA	NA	NA	NA	NA	NA	NA	NA	NA	Bulk RNA-seq	NA	NA	YES	NA
ATL06-2	TRA:CAASSASKIIF	NO	YES	NO	NO	0	0	0	0	24	0	24	CAASSASKIIF	NA	NA	NA	TRAV13-1	TRAJ3	TRAC	NA	NA	NA	NA	NA	NA	NA	NA	NA	NA	NA	NA	NA	NA	Bulk RNA-seq	YES	NA	NA	NA
ATL07	TRA:CAGDMRF;TRA:CVVNNYGQNFVF;TRB:CASTTGLGSTDKQYF	YES	NO	NO	NO	0	0	3	0	1414	1	1418	CAGDMRF	CVVNNYGQNFVF	CASTTGLGSTDKQYF	NA	TRAV20	TRAJ43	TRAC	TRBV5-5	TRBJ2-3	TRBC2	TRAV12-1	TRAJ26	TRAC	NA	NA	NA	WES	YES	YES	YES	NA	Bulk RNA-seq	YES	YES	YES	NA
ATL07	TRA:CAGDMRF;TRB:CASTTGLGSTDKQYF	NO	YES	NO	NO	0	0	1	0	1065	0	1066	CAGDMRF	NA	CASTTGLGSTDKQYF	NA	TRAV20	TRAJ43	TRAC	TRBV5-5	TRBJ2-3	TRBC2	NA	NA	NA	NA	NA	NA	WES	YES	NA	YES	NA	Bulk RNA-seq	YES	NA	YES	NA
ATL07	TRA:CVVNNYGQNFVF;TRB:CASTTGLGSTDKQYF	NO	YES	NO	NO	0	0	0	0	89	0	89	CVVNNYGQNFVF	NA	CASTTGLGSTDKQYF	NA	TRAV12-1	TRAJ26	TRAC	TRBV5-5	TRBJ2-3	TRBC2	NA	NA	NA	NA	NA	NA	WES	YES	NA	YES	NA	Bulk RNA-seq	YES	NA	YES	NA
ATL07	TRB:CASTTGLGSTDKQYF	NO	YES	NO	NO	0	0	1	0	88	0	89	NA	NA	CASTTGLGSTDKQYF	NA	NA	NA	NA	TRBV5-5	TRBJ2-3	TRBC2	NA	NA	NA	NA	NA	NA	WES	NA	NA	YES	NA	Bulk RNA-seq	NA	NA	YES	NA
ATL07	TRA:CAGDMRF	NO	YES	NO	NO	0	0	1	0	31	0	32	CAGDMRF	NA	NA	NA	TRAV20	TRAJ43	TRAC	NA	NA	NA	NA	NA	NA	NA	NA	NA	WES	YES	NA	NA	NA	Bulk RNA-seq	YES	NA	NA	NA
ATL07	TRA:CAGDMRF;TRA:CVVNNYGQNFVF	NO	YES	NO	NO	0	0	0	0	13	0	13	CAGDMRF	CVVNNYGQNFVF	NA	NA	TRAV20	TRAJ43	TRAC	NA	NA	NA	TRAV12-1	TRAJ26	TRAC	NA	NA	NA	WES	YES	YES	NA	NA	Bulk RNA-seq	YES	YES	NA	NA
ATL08	TRA:CAASNDYKLSF;TRB:CASSDYNEQFF	YES	NO	NO	NO	0	0	9	0	5507	0	5516	CAASNDYKLSF	NA	CASSDYNEQFF	NA	TRAV13-1	TRAJ20	TRAC	TRBV7-9	TRBJ2-1	TRBC2	NA	NA	NA	NA	NA	NA	WES	YES	NA	YES	NA	Bulk RNA-seq	YES	NA	YES	NA
ATL08	TRB:CASSDYNEQFF	NO	YES	NO	NO	0	1	2	0	143	0	146	NA	NA	CASSDYNEQFF	NA	NA	NA	NA	TRBV7-9	TRBJ2-1	TRBC2	NA	NA	NA	NA	NA	NA	WES	NA	NA	YES	NA	Bulk RNA-seq	NA	NA	YES	NA
ATL08	TRA:CAASNDYKLSF	NO	YES	NO	NO	0	0	0	0	13	0	13	CAASNDYKLSF	NA	NA	NA	TRAV13-1	TRAJ20	TRAC	NA	NA	NA	NA	NA	NA	NA	NA	NA	WES	YES	NA	NA	NA	Bulk RNA-seq	YES	NA	NA	NA
ATL09	TRA:CDVTGAGNNRKLIW;TRB:CASSYTGNYGYTF	YES	NO	NO	NO	0	0	0	0	5606	0	5606	CDVTGAGNNRKLIW	NA	CASSYTGNYGYTF	NA	TRAV12-2	TRAJ38	TRAC	TRBV6-5	TRBJ1-2	TRBC1	NA	NA	NA	NA	NA	NA	WES	YES	NA	YES	NA	Bulk RNA-seq	YES	NA	YES	NA
ATL09	TRB:CASSYTGNYGYTF	NO	YES	NO	NO	0	0	1	0	553	0	554	NA	NA	CASSYTGNYGYTF	NA	NA	NA	NA	TRBV6-5	TRBJ1-2	TRBC1	NA	NA	NA	NA	NA	NA	WES	NA	NA	YES	NA	Bulk RNA-seq	NA	NA	YES	NA
ATL09	TRA:CDVTGAGNNRKLIW	NO	YES	NO	NO	0	0	0	0	129	0	129	CDVTGAGNNRKLIW	NA	NA	NA	TRAV12-2	TRAJ38	TRAC	NA	NA	NA	NA	NA	NA	NA	NA	NA	WES	YES	NA	NA	NA	Bulk RNA-seq	YES	NA	NA	NA
ATL10	TRB:CASSKFGLCSGANVLTF	YES	NO	NO	NO	0	0	0	0	2768	0	2768	NA	NA	CASSKFGLCSGANVLTF	NA	NA	NA	NA	TRBV19	TRBJ2-6	TRBC2	NA	NA	NA	NA	NA	NA	WES	NA	NA	YES	NA	Bulk RNA-seq	NA	NA	YES	NA
ATL11	TRA:CATGSNTGKLIF;TRB:CAWSVGVTYGYTF	YES	NO	NO	NO	0	0	0	0	2496	0	2496	CATGSNTGKLIF	NA	CAWSVGVTYGYTF	NA	TRAV17	TRAJ37	TRAC	TRBV30	TRBJ1-2	TRBC1	NA	NA	NA	NA	NA	NA	WES	YES	NA	YES	NA	Bulk RNA-seq	YES	NA	YES	NA
ATL11	TRB:CAWSVGVTYGYTF	NO	YES	NO	NO	0	0	0	0	340	0	340	NA	NA	CAWSVGVTYGYTF	NA	NA	NA	NA	TRBV30	TRBJ1-2	TRBC1	NA	NA	NA	NA	NA	NA	WES	NA	NA	YES	NA	Bulk RNA-seq	NA	NA	YES	NA
ATL11	TRA:CATGSNTGKLIF	NO	YES	NO	NO	0	0	0	0	133	0	133	CATGSNTGKLIF	NA	NA	NA	TRAV17	TRAJ37	TRAC	NA	NA	NA	NA	NA	NA	NA	NA	NA	WES	YES	NA	NA	NA	Bulk RNA-seq	YES	NA	NA	NA
ATL12	TRA:CAASMAAGNKLTF;TRB:CSATQGQDTQYF	YES	NO	NO	NO	0	0	0	0	1198	0	1198	CAASMAAGNKLTF	NA	CSATQGQDTQYF	NA	TRAV13-1	TRAJ17	TRAC	TRBV20-1	TRBJ2-3	TRBC2	NA	NA	NA	NA	NA	NA	WES	YES	NA	YES	NA	Bulk RNA-seq	YES	NA	YES	NA
ATL12	TRB:CSATQGQDTQYF	NO	YES	NO	NO	0	0	0	0	695	0	695	NA	NA	CSATQGQDTQYF	NA	NA	NA	NA	TRBV20-1	TRBJ2-3	TRBC2	NA	NA	NA	NA	NA	NA	WES	NA	NA	YES	NA	Bulk RNA-seq	NA	NA	YES	NA
ATL13	TRA:CAGDGGTASKLTF;TRB:CASSSLTGTYGYTF	YES	NO	NO	NO	0	2	27	0	2186	0	2215	CAGDGGTASKLTF	NA	CASSSLTGTYGYTF	NA	TRAV27	TRAJ44	TRAC	TRBV6-5	TRBJ1-2	TRBC1	NA	NA	NA	NA	NA	NA	WES	YES	NA	YES	NA	Bulk RNA-seq	YES	NA	YES	NA
ATL13	TRA:CAGDGGTASKLTF	NO	YES	NO	NO	0	0	0	0	27	0	27	CAGDGGTASKLTF	NA	NA	NA	TRAV27	TRAJ44	TRAC	NA	NA	NA	NA	NA	NA	NA	NA	NA	WES	YES	NA	NA	NA	Bulk RNA-seq	YES	NA	NA	NA
ATL13	TRB:CASSSLTGTYGYTF	NO	YES	NO	NO	0	0	0	0	27	0	27	NA	NA	CASSSLTGTYGYTF	NA	NA	NA	NA	TRBV6-5	TRBJ1-2	TRBC1	NA	NA	NA	NA	NA	NA	WES	NA	NA	YES	NA	Bulk RNA-seq	NA	NA	YES	NA
ATL14	TRA:CAFKSRGGSEKLVF;TRB:CASCTPGQGARYEQYF	YES	NO	NO	NO	1	3	8	0	3833	0	3845	CAFKSRGGSEKLVF	NA	CASCTPGQGARYEQYF	NA	TRAV38-1	TRAJ57	TRAC	TRBV6-1	TRBJ2-7	TRBC2	NA	NA	NA	NA	NA	NA	WES	YES	NA	YES	NA	Bulk RNA-seq	YES	NA	YES	NA
ATL14	TRB:CASCTPGQGARYEQYF	NO	YES	NO	NO	0	1	6	0	500	0	507	NA	NA	CASCTPGQGARYEQYF	NA	NA	NA	NA	TRBV6-1	TRBJ2-7	TRBC2	NA	NA	NA	NA	NA	NA	WES	NA	NA	YES	NA	Bulk RNA-seq	NA	NA	YES	NA
ATL14	TRA:CAFKSRGGSEKLVF	NO	YES	NO	NO	0	1	0	0	173	0	174	CAFKSRGGSEKLVF	NA	NA	NA	TRAV38-1	TRAJ57	TRAC	NA	NA	NA	NA	NA	NA	NA	NA	NA	WES	YES	NA	NA	NA	Bulk RNA-seq	YES	NA	NA	NA
ATL15	TRA:CAARGANSKLTF;TRB:CASSPRGSGTEQFF	YES	NO	NO	NO	0	0	0	0	1680	0	1680	CAARGANSKLTF	NA	CASSPRGSGTEQFF	NA	TRAV13-1	TRAJ56	TRAC	TRBV11-3	TRBJ2-1	TRBC2	NA	NA	NA	NA	NA	NA	WES	YES	NA	YES	NA	Bulk RNA-seq	YES	NA	YES	NA
ATL15	TRA:CAARGANSKLTF	NO	YES	NO	NO	0	0	0	0	348	0	348	CAARGANSKLTF	NA	NA	NA	TRAV13-1	TRAJ56	TRAC	NA	NA	NA	NA	NA	NA	NA	NA	NA	WES	YES	NA	NA	NA	Bulk RNA-seq	YES	NA	NA	NA
ATL15	TRB:CASSPRGSGTEQFF	NO	YES	NO	NO	0	0	0	0	101	0	101	NA	NA	CASSPRGSGTEQFF	NA	NA	NA	NA	TRBV11-3	TRBJ2-1	TRBC2	NA	NA	NA	NA	NA	NA	WES	NA	NA	YES	NA	Bulk RNA-seq	NA	NA	YES	NA
ATL15	TRB:CASSPSGSGTEQFF	NO	NO	YES	NO	0	0	0	0	14	0	14	NA	NA	CASSPSGSGTEQFF	NA	NA	NA	NA	TRBV11-3	TRBJ2-1	TRBC2	NA	NA	NA	NA	NA	NA	WES	NA	NA	NO	NA	Bulk RNA-seq	NA	NA	YES	NA
ATL15	TRA:CAARGANTKLTF;TRB:CASSPSGSGTEQFF	NO	NO	YES	NO	0	0	0	0	8	0	8	CAARGANTKLTF	NA	CASSPSGSGTEQFF	NA	TRAV13-1	TRAJ56	TRAC	TRBV11-3	TRBJ2-1	TRBC2	NA	NA	NA	NA	NA	NA	WES	YES	NA	NO	NA	Bulk RNA-seq	YES	NA	YES	NA
ATL15	TRA:CAGGNAGNNRKLIW;TRB:CASSWEDRRLQFF;TRB:CASSSGTTIYTQYF	NO	NO	NO	YES	0	0	3	0	5	0	8	CAGGNAGNNRKLIW	NA	CASSWEDRRLQFF	CASSSGTTIYTQYF	TRAV25	TRAJ38	TRAC	TRBV7-2	TRBJ2-1	TRBC2	NA	NA	NA	TRBV6-3	TRBJ2-3	TRBC2	WES	YES	NA	NO	NO	Bulk RNA-seq	YES	NA	YES	YES
ATL15	TRA:CAARGANSKLTF;TRB:CASSPSGSGTEQFF	NO	NO	YES	NO	0	0	0	0	7	0	7	CAARGANSKLTF	NA	CASSPSGSGTEQFF	NA	TRAV13-1	TRAJ56	TRAC	TRBV11-3	TRBJ2-1	TRBC2	NA	NA	NA	NA	NA	NA	WES	YES	NA	NO	NA	Bulk RNA-seq	YES	NA	YES	NA
ATL16	TRA:CVVNMRYSGGGADGLTF;TRB:CSARARGDSDSPSSYNEQFF	YES	NO	NO	NO	0	0	12	0	390	1	403	CVVNMRYSGGGADGLTF	NA	CSARARGDSDSPSSYNEQFF	NA	TRAV12-1	TRAJ45	TRAC	TRBV20-1	TRBJ2-1	TRBC2	NA	NA	NA	NA	NA	NA	WES	YES	NA	YES	NA	Bulk RNA-seq	YES	NA	YES	NA
ATL16	TRB:CSARARGDSDSPSSYNEQFF	NO	YES	NO	NO	0	1	8	0	229	0	238	NA	NA	CSARARGDSDSPSSYNEQFF	NA	NA	NA	NA	TRBV20-1	TRBJ2-1	TRBC2	NA	NA	NA	NA	NA	NA	WES	NA	NA	YES	NA	Bulk RNA-seq	NA	NA	YES	NA
ATL17	TRB:CASSEGTTGNNEQFF	YES	NO	NO	NO	1	0	22	0	888	0	911	NA	NA	CASSEGTTGNNEQFF	NA	NA	NA	NA	TRBV6-1	TRBJ2-1	TRBC2	NA	NA	NA	NA	NA	NA	WES	NA	NA	YES	NA	Bulk RNA-seq	NA	NA	YES	NA
ATL17	TRA:CAVNSGGYQKVTF;TRB:CASSEGTTGNNEQFF	NO	YES	NO	NO	0	0	8	0	630	1	639	CAVNSGGYQKVTF	NA	CASSEGTTGNNEQFF	NA	TRAV1-2	TRAJ13	TRAC	TRBV6-1	TRBJ2-1	TRBC2	NA	NA	NA	NA	NA	NA	WES	YES	NA	YES	NA	Bulk RNA-seq	YES	NA	YES	NA
ATL18	TRA:CALGGGAQKLVF	YES	NO	NO	NO	0	0	2	0	3146	1	3149	CALGGGAQKLVF	NA	NA	NA	TRAV9-2	TRAJ54	TRAC	NA	NA	NA	NA	NA	NA	NA	NA	NA	WES	YES	NA	NA	NA	Bulk RNA-seq	YES	NA	NA	NA
ATL18	TRA:CALGGGAQKLVF;TRB:CASSLEEGAGFGYTF	NO	YES	NO	NO	0	0	0	0	330	0	330	CALGGGAQKLVF	NA	CASSLEEGAGFGYTF	NA	TRAV9-2	TRAJ54	TRAC	TRBV5-6	TRBJ1-2	TRBC1	NA	NA	NA	NA	NA	NA	WES	YES	NA	YES	NA	Bulk RNA-seq	YES	NA	YES	NA
ATL18	TRB:CASSLEEGAGFGYTF	NO	NO	NO	YES	0	0	3	0	58	0	61	NA	NA	CASSLEEGAGFGYTF	NA	NA	NA	NA	TRBV5-6	TRBJ1-2	TRBC1	NA	NA	NA	NA	NA	NA	WES	NA	NA	YES	NA	Bulk RNA-seq	NA	NA	YES	NA
ATL19	TRA:CTYGSSNTGKLIF	YES	NO	NO	NO	0	0	3	0	2146	0	2149	CTYGSSNTGKLIF	NA	NA	NA	TRAV38-2DV8	TRAJ37	TRAC	NA	NA	NA	NA	NA	NA	NA	NA	NA	WES	YES	NA	NA	NA	Bulk RNA-seq	YES	NA	NA	NA
ATL19	TRA:CTYGSSNTGKLIF;TRA:CALSDSYSGAGSYQLTF;TRB:CASPKDGSPLLRYEQYF;TRB:CASSVRDSFVEQFF	NO	YES	NO	NO	0	0	0	0	5	3	8	CTYGSSNTGKLIF	CALSDSYSGAGSYQLTF	CASPKDGSPLLRYEQYF	CASSVRDSFVEQFF	TRAV38-2DV8	TRAJ37	TRAC	TRBV4-3	TRBJ2-7	TRBC2	TRAV19	TRAJ28	TRAC	TRBV6-1	TRBJ2-1	TRBC2	WES	YES	NO	NO	YES	Bulk RNA-seq	YES	YES	YES	YES
ATL19	TRA:CTYGSSNTGKLIF;TRB:CASPKDGSPLLRYEQYF	NO	YES	NO	NO	0	0	0	0	5	0	5	CTYGSSNTGKLIF	NA	CASPKDGSPLLRYEQYF	NA	TRAV38-2DV8	TRAJ37	TRAC	TRBV4-3	TRBJ2-7	TRBC2	NA	NA	NA	NA	NA	NA	WES	YES	NA	NO	NA	Bulk RNA-seq	YES	NA	YES	NA
ATL20	TRA:CVVRFPFNDYKLSF;TRB:CASSEGLAADNRVYDKQYF	YES	NO	NO	NO	0	0	2	0	2551	0	2553	CVVRFPFNDYKLSF	NA	CASSEGLAADNRVYDKQYF	NA	TRAV1-2	TRAJ20	TRAC	TRBV6-1	TRBJ2-7	TRBC2	NA	NA	NA	NA	NA	NA	WES	YES	NA	YES	NA	Bulk RNA-seq	YES	NA	YES	NA
ATL20	TRB:CASSEGLAADNRVYDKQYF	NO	YES	NO	NO	0	1	3	0	449	0	453	NA	NA	CASSEGLAADNRVYDKQYF	NA	NA	NA	NA	TRBV6-1	TRBJ2-7	TRBC2	NA	NA	NA	NA	NA	NA	WES	NA	NA	YES	NA	Bulk RNA-seq	NA	NA	YES	NA
ATL20	TRA:CVVRFPFNDYKLSF	NO	YES	NO	NO	0	0	0	0	23	0	23	CVVRFPFNDYKLSF	NA	NA	NA	TRAV1-2	TRAJ20	TRAC	NA	NA	NA	NA	NA	NA	NA	NA	NA	WES	YES	NA	NA	NA	Bulk RNA-seq	YES	NA	NA	NA
ATL21	TRA:CALSGTSETYKYIF;TRB:CSARGQNTGELFF	YES	NO	NO	NO	1	0	15	3	282	0	301	CALSGTSETYKYIF	NA	CSARGQNTGELFF	NA	TRAV9-2	TRAJ40	TRAC	TRBV20-1	TRBJ2-2	TRBC2	NA	NA	NA	NA	NA	NA	WES	YES	NA	YES	NA	Bulk RNA-seq	YES	NA	YES	NA
ATL21	TRB:CSARGQNTGELFF	NO	YES	NO	NO	0	1	8	0	241	0	250	NA	NA	CSARGQNTGELFF	NA	NA	NA	NA	TRBV20-1	TRBJ2-2	TRBC2	NA	NA	NA	NA	NA	NA	WES	NA	NA	YES	NA	Bulk RNA-seq	NA	NA	YES	NA
ATL22	TRA:CAASNFNKFYF;TRB:CASSIDRGYGYTF	YES	NO	NO	NO	0	0	1	0	196	0	197	CAASNFNKFYF	NA	CASSIDRGYGYTF	NA	TRAV13-1	TRAJ21	TRAC	TRBV19	TRBJ1-2	TRBC1	NA	NA	NA	NA	NA	NA	WES	YES	NA	YES	NA	Bulk RNA-seq	YES	NA	YES	NA
ATL22	TRA:CAASNFNKFYF	NO	YES	NO	NO	1	0	1	0	154	1	157	CAASNFNKFYF	NA	NA	NA	TRAV13-1	TRAJ21	TRAC	NA	NA	NA	NA	NA	NA	NA	NA	NA	WES	YES	NA	NA	NA	Bulk RNA-seq	YES	NA	NA	NA
ATL22	TRB:CASSIDRGYGYTF	NO	YES	NO	NO	0	0	0	0	14	0	14	NA	NA	CASSIDRGYGYTF	NA	NA	NA	NA	TRBV19	TRBJ1-2	TRBC1	NA	NA	NA	NA	NA	NA	WES	NA	NA	YES	NA	Bulk RNA-seq	NA	NA	YES	NA
ATL22-2	TRA:CAASNFNKFYF;TRB:CASSIDRGYGYTF	YES	NO	NO	NO	0	0	5	2	3602	1	3610	CAASNFNKFYF	NA	CASSIDRGYGYTF	NA	TRAV13-1	TRAJ21	TRAC	TRBV19	TRBJ1-2	TRBC1	NA	NA	NA	NA	NA	NA	WES	YES	NA	YES	NA	NA	NA	NA	NA	NA
ATL22-2	TRA:CAASNFNKFYF	NO	YES	NO	NO	1	0	1	0	571	1	574	CAASNFNKFYF	NA	NA	NA	TRAV13-1	TRAJ21	TRAC	NA	NA	NA	NA	NA	NA	NA	NA	NA	WES	YES	NA	NA	NA	NA	NA	NA	NA	NA
ATL22-2	TRB:CASSIDRGYGYTF	NO	YES	NO	NO	0	0	0	0	35	0	35	NA	NA	CASSIDRGYGYTF	NA	NA	NA	NA	TRBV19	TRBJ1-2	TRBC1	NA	NA	NA	NA	NA	NA	WES	NA	NA	YES	NA	NA	NA	NA	NA	NA
ATL23	TRB:CSALGGGGIEQYF;TRB:CANTRTSAYNEQFF	YES	NO	NO	NO	0	0	16	0	4605	1	4622	NA	NA	CSALGGGGIEQYF	CANTRTSAYNEQFF	NA	NA	NA	TRBV20-1	TRBJ2-7	TRBC2	NA	NA	NA	TRBV28	TRBJ2-1	TRBC2	WES	NA	NA	YES	YES	Bulk RNA-seq	NA	NA	YES	YES
ATL23	TRB:CANTRTSAYNEQFF	NO	YES	NO	NO	1	0	7	0	323	7	338	NA	NA	CANTRTSAYNEQFF	NA	NA	NA	NA	TRBV28	TRBJ2-1	TRBC2	NA	NA	NA	NA	NA	NA	WES	NA	NA	YES	NA	Bulk RNA-seq	NA	NA	YES	NA
ATL23	TRA:CAMSEGGGGNKLTF;TRB:CSALGGGGIEQYF;TRB:CANTRTSAYNEQFF	NO	YES	NO	NO	0	0	0	0	21	0	21	CAMSEGGGGNKLTF	NA	CSALGGGGIEQYF	CANTRTSAYNEQFF	TRAV12-3	TRAJ10	None	TRBV20-1	TRBJ2-7	TRBC2	NA	NA	NA	TRBV28	TRBJ2-1	TRBC2	WES	YES	NA	YES	YES	Bulk RNA-seq	YES	NA	YES	YES
ATL23	TRB:CSALGGGGIEQYF	NO	YES	NO	NO	0	0	1	0	17	0	18	NA	NA	CSALGGGGIEQYF	NA	NA	NA	NA	TRBV20-1	TRBJ2-7	TRBC2	NA	NA	NA	NA	NA	NA	WES	NA	NA	YES	NA	Bulk RNA-seq	NA	NA	YES	NA
ATL24	TRA:CAVGAQNARLMF;TRB:CSASAGINYGYTF	YES	NO	NO	NO	0	0	5	1	1806	0	1812	CAVGAQNARLMF	NA	CSASAGINYGYTF	NA	TRAV8-3	TRAJ31	TRAC	TRBV20-1	TRBJ1-2	TRBC1	NA	NA	NA	NA	NA	NA	WES	YES	NA	YES	NA	Bulk RNA-seq	YES	NA	YES	NA
ATL24	TRB:CSASAGINYGYTF	NO	YES	NO	NO	0	1	12	0	433	0	446	NA	NA	CSASAGINYGYTF	NA	NA	NA	NA	TRBV20-1	TRBJ1-2	TRBC1	NA	NA	NA	NA	NA	NA	WES	NA	NA	YES	NA	Bulk RNA-seq	NA	NA	YES	NA
ATL24	TRA:CAVGAQNARLMF	NO	YES	NO	NO	0	0	1	0	7	0	8	CAVGAQNARLMF	NA	NA	NA	TRAV8-3	TRAJ31	TRAC	NA	NA	NA	NA	NA	NA	NA	NA	NA	WES	YES	NA	NA	NA	Bulk RNA-seq	YES	NA	NA	NA
ATL24	TRA:CAVKRWGSNYKLTF;TRB:CASTPRGGPQETQYF	NO	NO	NO	YES	0	0	0	0	6	0	6	CAVKRWGSNYKLTF	NA	CASTPRGGPQETQYF	NA	TRAV12-2	TRAJ53	TRAC	TRBV5-1	TRBJ2-5	TRBC2	NA	NA	NA	NA	NA	NA	WES	NO	NA	NO	NA	Bulk RNA-seq	NO	NA	YES	NA
ATL24	TRA:CAASATRSGGSNYKLTF;TRA:CAVGAQNARLMF;TRB:CSASAGINYGYTF	NO	YES	NO	NO	0	0	0	0	5	0	5	CAASATRSGGSNYKLTF	CAVGAQNARLMF	CSASAGINYGYTF	NA	TRAV29DV5	TRAJ53	TRAC	TRBV20-1	TRBJ1-2	TRBC1	TRAV8-3	TRAJ31	TRAC	NA	NA	NA	WES	NO	YES	YES	NA	Bulk RNA-seq	YES	YES	YES	NA
ATL25	TRA:CALSNVAGGTSYGKLTF;TRB:CASRTVDRDNEQFL	YES	NO	NO	NO	0	0	11	0	4226	0	4237	CALSNVAGGTSYGKLTF	NA	CASRTVDRDNEQFL	NA	TRAV9-2	TRAJ52	TRAC	TRBV5-4	TRBJ2-1	TRBC2	NA	NA	NA	NA	NA	NA	WES	YES	NA	YES	NA	Bulk RNA-seq	YES	NA	YES	NA
ATL25	TRB:CASRTVDRDNEQFL	NO	YES	NO	NO	0	1	3	0	111	0	115	NA	NA	CASRTVDRDNEQFL	NA	NA	NA	NA	TRBV5-4	TRBJ2-1	TRBC2	NA	NA	NA	NA	NA	NA	WES	NA	NA	YES	NA	Bulk RNA-seq	NA	NA	YES	NA
ATL25	TRA:CALSNVAGGTSYGKLTF	NO	YES	NO	NO	0	0	0	0	51	1	52	CALSNVAGGTSYGKLTF	NA	NA	NA	TRAV9-2	TRAJ52	TRAC	NA	NA	NA	NA	NA	NA	NA	NA	NA	WES	YES	NA	NA	NA	Bulk RNA-seq	YES	NA	NA	NA
ATL25	TRA:CAMSLTGNQFYF;TRA:CALSNVAGGTSYGKLTF;TRB:CASRTVDRDNEQFL;TRB:CASGKTGFGNTIYF	NO	YES	NO	NO	0	0	0	0	6	0	6	CAMSLTGNQFYF	CALSNVAGGTSYGKLTF	CASRTVDRDNEQFL	CASGKTGFGNTIYF	TRAV14DV4	TRAJ49	TRAC	TRBV5-4	TRBJ2-1	TRBC2	TRAV9-2	TRAJ52	TRAC	TRBV6-5	TRBJ1-3	TRBC1	WES	YES	YES	YES	YES	Bulk RNA-seq	YES	YES	YES	YES
ATL26	TRA:CAVSNFGNEKLTF;TRB:CAWSVQGDTQYF	YES	NO	NO	NO	0	0	4	0	655	0	659	CAVSNFGNEKLTF	NA	CAWSVQGDTQYF	NA	TRAV22	TRAJ48	TRAC	TRBV30	TRBJ2-3	TRBC2	NA	NA	NA	NA	NA	NA	WES	YES	NA	YES	NA	Bulk RNA-seq	YES	NA	YES	NA
ATL26	TRB:CAWSVQGDTQYF	NO	YES	NO	NO	0	0	0	0	104	0	104	NA	NA	CAWSVQGDTQYF	NA	NA	NA	NA	TRBV30	TRBJ2-3	TRBC2	NA	NA	NA	NA	NA	NA	WES	NA	NA	YES	NA	Bulk RNA-seq	NA	NA	YES	NA
ATL26	TRA:CAVSNFGNEKLTF	NO	YES	NO	NO	0	0	0	0	62	0	62	CAVSNFGNEKLTF	NA	NA	NA	TRAV22	TRAJ48	TRAC	NA	NA	NA	NA	NA	NA	NA	NA	NA	WES	YES	NA	NA	NA	Bulk RNA-seq	YES	NA	NA	NA
ATL27	TRA:CAVQGGTASKLTF;TRB:CASSPRTGGSNQPQHF	YES	NO	NO	NO	0	6	6	0	1301	0	1313	CAVQGGTASKLTF	NA	CASSPRTGGSNQPQHF	NA	TRAV13-1	TRAJ44	TRAC	TRBV19	TRBJ1-5	TRBC1	NA	NA	NA	NA	NA	NA	WES	YES	NA	YES	NA	Bulk RNA-seq	YES	NA	YES	NA
ATL27	TRB:CASSPRTGGSNQPQHF	NO	YES	NO	NO	0	5	3	0	156	0	164	NA	NA	CASSPRTGGSNQPQHF	NA	NA	NA	NA	TRBV19	TRBJ1-5	TRBC1	NA	NA	NA	NA	NA	NA	WES	NA	NA	YES	NA	Bulk RNA-seq	NA	NA	YES	NA
ATL27	TRA:CAVQGGTASKLTF	NO	YES	NO	NO	0	0	0	0	7	0	7	CAVQGGTASKLTF	NA	NA	NA	TRAV13-1	TRAJ44	TRAC	NA	NA	NA	NA	NA	NA	NA	NA	NA	WES	YES	NA	NA	NA	Bulk RNA-seq	YES	NA	NA	NA
ATL28	TRA:CALSDAGNNRKLIW;TRB:CASSIGQGTDTQYF	YES	NO	NO	NO	0	0	1	0	3612	0	3613	CALSDAGNNRKLIW	NA	CASSIGQGTDTQYF	NA	TRAV9-2	TRAJ38	TRAC	TRBV19	TRBJ2-3	TRBC2	NA	NA	NA	NA	NA	NA	WES	YES	NA	YES	NA	Bulk RNA-seq	YES	NA	YES	NA
ATL28	TRB:CASSIGQGTDTQYF	NO	YES	NO	NO	0	1	0	0	1047	0	1048	NA	NA	CASSIGQGTDTQYF	NA	NA	NA	NA	TRBV19	TRBJ2-3	TRBC2	NA	NA	NA	NA	NA	NA	WES	NA	NA	YES	NA	Bulk RNA-seq	NA	NA	YES	NA
ATL28	TRA:CALSDAGNNRKLIW	NO	YES	NO	NO	0	0	0	0	107	0	107	CALSDAGNNRKLIW	NA	NA	NA	TRAV9-2	TRAJ38	TRAC	NA	NA	NA	NA	NA	NA	NA	NA	NA	WES	YES	NA	NA	NA	Bulk RNA-seq	YES	NA	NA	NA
ATL29	TRA:CAVRRSGGSYIPTF;TRB:CSARDSCLTDTQYF	YES	NO	NO	NO	0	0	23	0	2595	0	2618	CAVRRSGGSYIPTF	NA	CSARDSCLTDTQYF	NA	TRAV21	TRAJ6	TRAC	TRBV20-1	TRBJ2-3	TRBC2	NA	NA	NA	NA	NA	NA	WES	YES	NA	YES	NA	Bulk RNA-seq	YES	NA	YES	NA
ATL29	TRB:CSARDSCLTDTQYF	NO	YES	NO	NO	0	0	19	0	982	0	1001	NA	NA	CSARDSCLTDTQYF	NA	NA	NA	NA	TRBV20-1	TRBJ2-3	TRBC2	NA	NA	NA	NA	NA	NA	WES	NA	NA	YES	NA	Bulk RNA-seq	NA	NA	YES	NA
ATL29	TRA:CAVRRSGGSYIPTF	NO	YES	NO	NO	0	0	0	0	6	0	6	CAVRRSGGSYIPTF	NA	NA	NA	TRAV21	TRAJ6	TRAC	NA	NA	NA	NA	NA	NA	NA	NA	NA	WES	YES	NA	NA	NA	Bulk RNA-seq	YES	NA	NA	NA
ATL30	TRA:CAARSTGGFKTIF;TRB:CASSEVRGTEAFF	YES	NO	NO	NO	0	5	16	0	2382	0	2403	CAARSTGGFKTIF	NA	CASSEVRGTEAFF	NA	TRAV13-1	TRAJ9	TRAC	TRBV6-1	TRBJ1-1	TRBC1	NA	NA	NA	NA	NA	NA	WES	YES	NA	YES	NA	Bulk RNA-seq	YES	NA	YES	NA
ATL30	TRA:CAEPDNQAGTALIF;TRB:CASSVGQGKETQYF	NO	NO	NO	YES	0	2	23	0	337	0	362	CAEPDNQAGTALIF	NA	CASSVGQGKETQYF	NA	TRAV13-2	TRAJ15	TRAC	TRBV5-1	TRBJ2-5	TRBC2	NA	NA	NA	NA	NA	NA	WES	YES	NA	YES	NA	Bulk RNA-seq	YES	NA	YES	NA
ATL30	TRB:CASSEVRGTEAFF	NO	YES	NO	NO	0	2	2	0	203	0	207	NA	NA	CASSEVRGTEAFF	NA	NA	NA	NA	TRBV6-1	TRBJ1-1	TRBC1	NA	NA	NA	NA	NA	NA	WES	NA	NA	YES	NA	Bulk RNA-seq	NA	NA	YES	NA
ATL30	TRA:CAARSTGGFKTIF	NO	YES	NO	NO	0	0	0	0	41	0	41	CAARSTGGFKTIF	NA	NA	NA	TRAV13-1	TRAJ9	TRAC	NA	NA	NA	NA	NA	NA	NA	NA	NA	WES	YES	NA	NA	NA	Bulk RNA-seq	YES	NA	NA	NA
ATL30	TRB:CASSVGQGKETQYF	NO	NO	NO	YES	0	0	8	0	16	0	24	NA	NA	CASSVGQGKETQYF	NA	NA	NA	NA	TRBV5-1	TRBJ2-5	TRBC2	NA	NA	NA	NA	NA	NA	WES	NA	NA	YES	NA	Bulk RNA-seq	NA	NA	YES	NA
ATL30	TRA:CAEPDNQAGTALIF;TRA:CAARSTGGFKTIF;TRB:CASSVGQGKETQYF;TRB:CASSEVRGTEAFF	NO	YES	NO	NO	0	0	0	0	13	0	13	CAEPDNQAGTALIF	CAARSTGGFKTIF	CASSVGQGKETQYF	CASSEVRGTEAFF	TRAV13-2	TRAJ15	TRAC	TRBV5-1	TRBJ2-5	TRBC2	TRAV13-1	TRAJ9	TRAC	TRBV6-1	TRBJ1-1	TRBC1	WES	YES	YES	YES	YES	Bulk RNA-seq	YES	YES	YES	YES
NA, not available.
